# Supplementary material for: Identification of the Regulatory Elements and Protein Substrates of Lysine Acetoacetylation
Source: eLife journal article supplement (doi:10.7554/elife.104123), 2025-04-22
Supplement: fig1-data1 [file elife-104123-fig1-data1-v1.pdf]

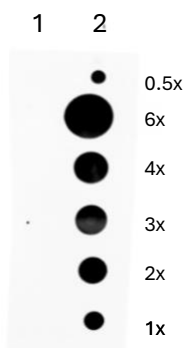

**Figure 1, Source Data 1.** Original membrane corresponding to Figure 1, panel B. Different dot sizes represent varying loading amounts of the H2BK15acac peptide, either without NaBH<sub>4</sub> reduction (lane 1) or with NaBH<sub>4</sub> reduction (lane 2), as detected by blotting with anti-Kbhb antibody.
