# Supplementary material for: Identification of the Regulatory Elements and Protein Substrates of Lysine Acetoacetylation
Source: eLife journal article supplement (doi:10.7554/elife.104123), 2025-04-22
Supplement: fig2-data1 [file elife-104123-fig2-data1-v1.pdf]

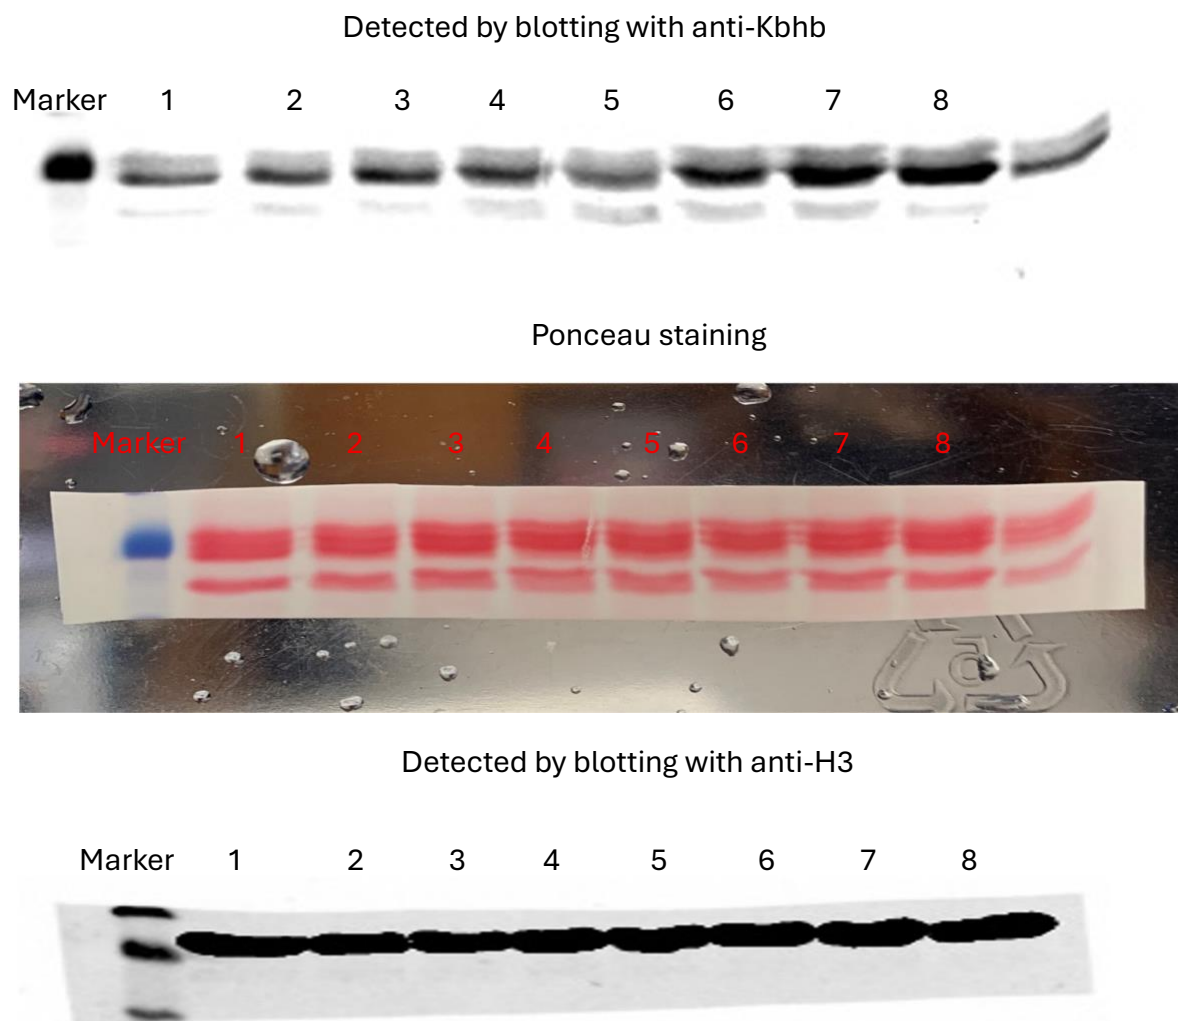

**Figure 2, Source Data 1.** (A) Original membranes corresponding to Figure 2, panel A. Lanes 1–4 show non- $\text{NaBH}_4$ -reduced histone samples from HEK293T cells treated with 0, 5, 10, or 20 mM acetoacetate, whereas lanes 5–8 show the corresponding  $\text{NaBH}_4$ -reduced histone samples treated under the same conditions.

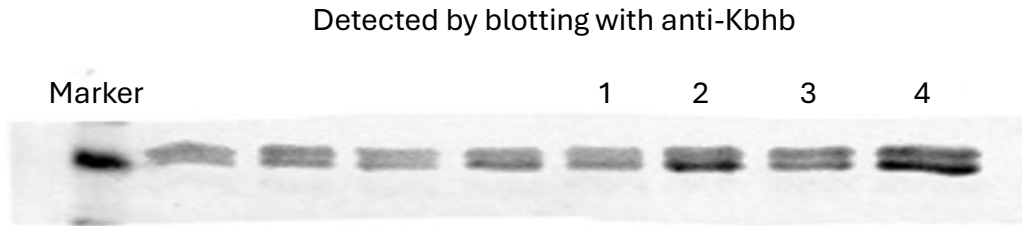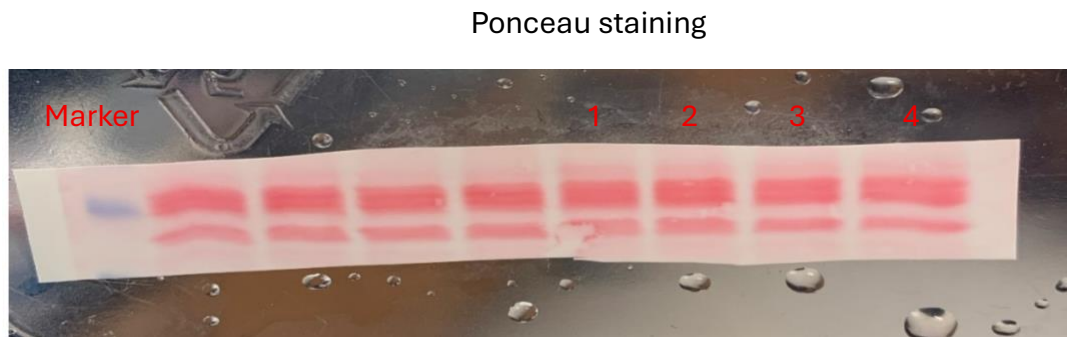

**Figure 2, Source Data 1.** (B) Original membranes corresponding to Figure 2, panel B. Lanes 1–2 show non- $\text{NaBH}_4$ -reduced histone samples from HCT116 cells treated with 0 or 20 mM acetoacetate, whereas lanes 3–4 show the corresponding  $\text{NaBH}_4$ -reduced histone samples under the same conditions.

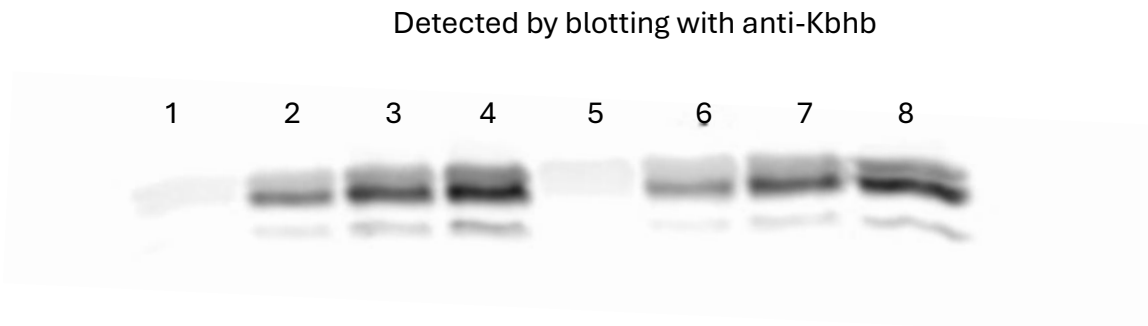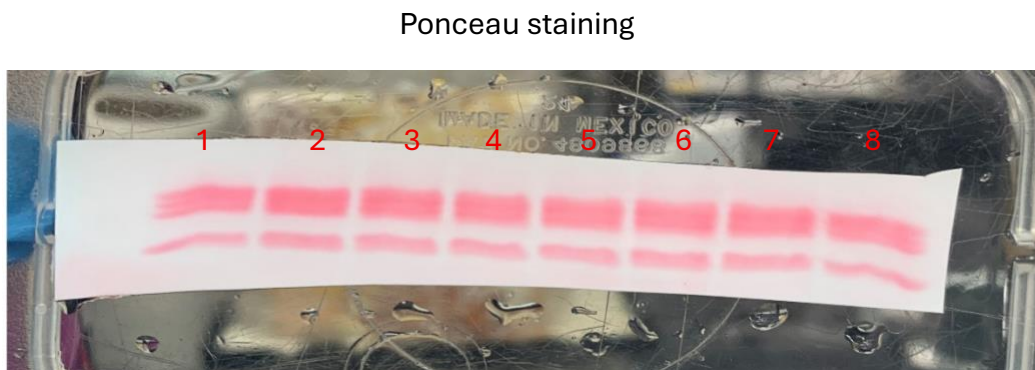

**Figure 2, Source Data 1.** (C) Original membranes corresponding to Figure 2, panel C. Lanes 1–4 show non- $\text{NaBH}_4$ -reduced histone samples from HEK293T cells treated with 0, 5, 10, or 20 mM  $\beta$ -hydroxybutyrate, while lanes 5–8 show  $\text{NaBH}_4$ -reduced histone samples from HEK293T cells treated with the same concentrations.

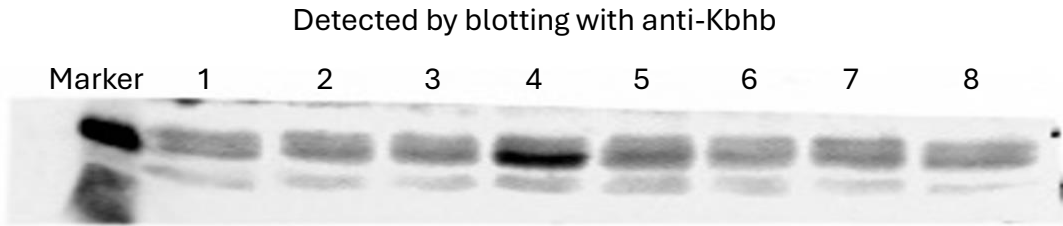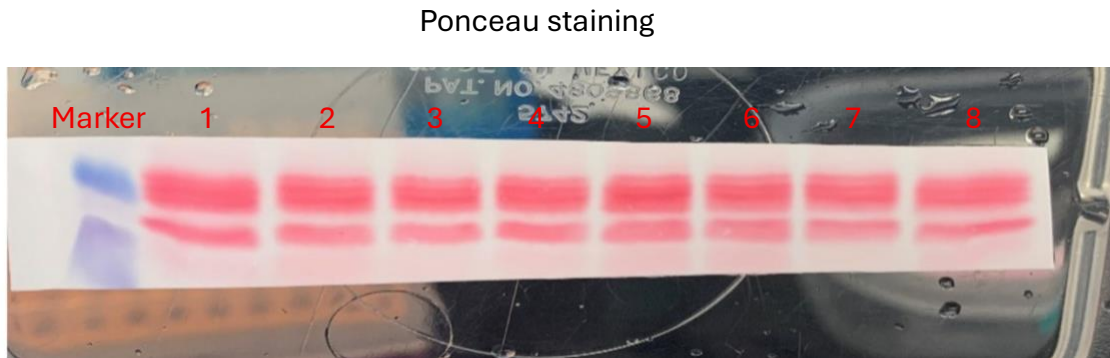

**Figure 2, Source Data 1.** (D) Original membranes corresponding to Figure 2, panel D. Lanes 1–4 show  $\text{NaBH}_4$ -reduced histone samples from HEK293T cells with no treatment or treated with leucine, lysine, or acetoacetate, whereas lanes 5–8 show the corresponding non- $\text{NaBH}_4$ -reduced histone samples under the same conditions.

Detected by blotting with anti-Kbhb

Marker 1 2 3 4 5 6 7 8

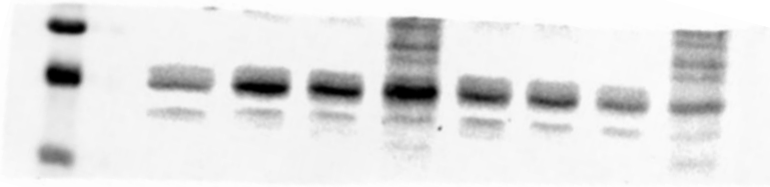

Ponceau staining

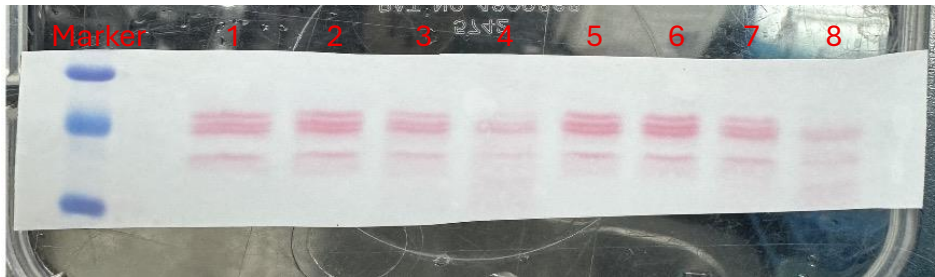

Detected by blotting with anti-H3

Marker 1 2 3 4 5 6 7 8

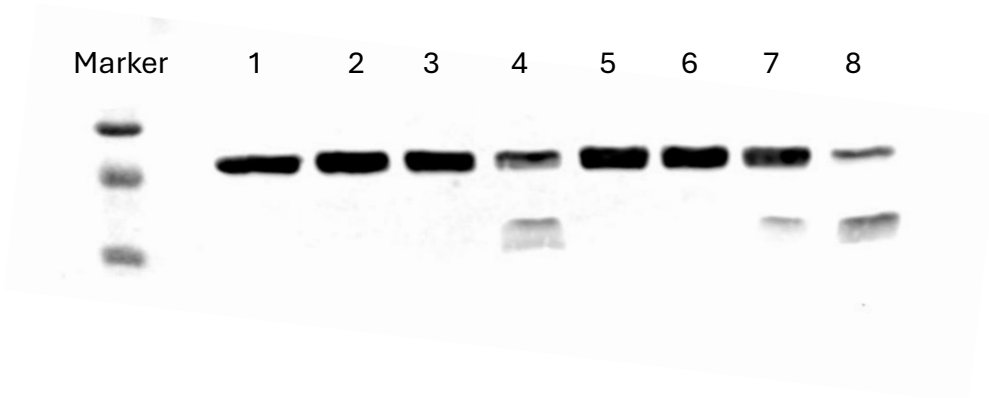

**Figure 2, Source Data 1.** (E) Original membranes corresponding to Figure 2, panel E. Lanes 1–4 show NaBH<sub>4</sub>-reduced histone samples from HEK293T cells subjected to no treatment, acetoacetate treatment, SCOT overexpression plus acetoacetate treatment, or AACS overexpression plus acetoacetate treatment, while lanes 5–8 show the corresponding non-NaBH<sub>4</sub>-reduced histone samples under the same conditions.

Detected by blotting with anti-Kbhb

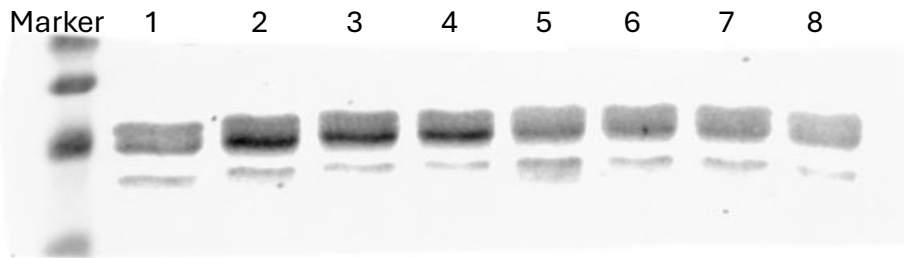

Ponceau staining

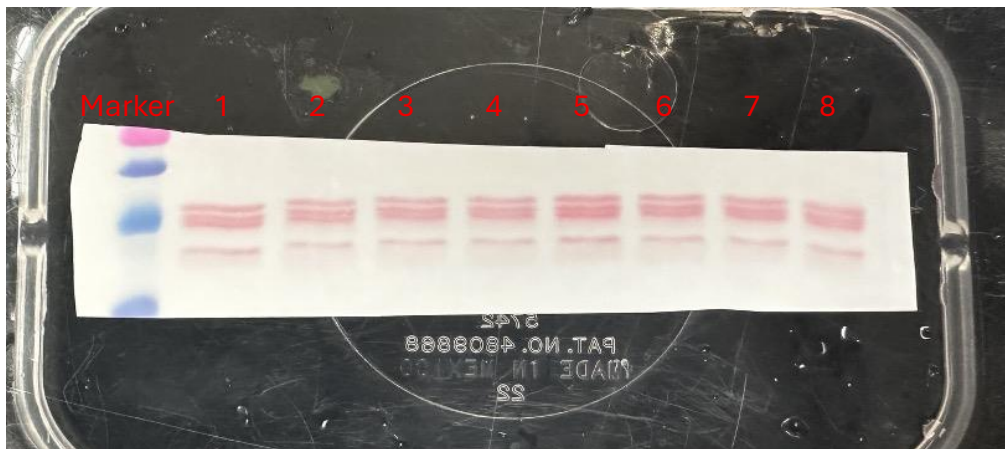

Detected by blotting with anti-H3

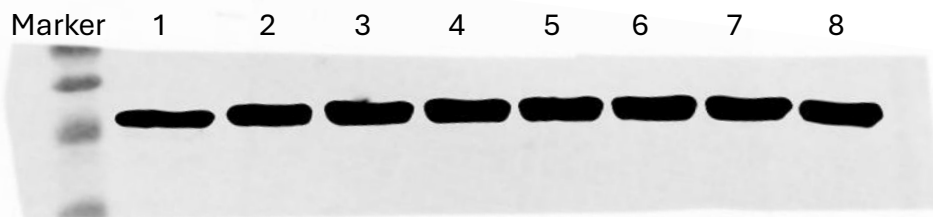

**Figure 2, Source Data 1.** (F) Original membranes corresponding to Figure 2, panel F. Lanes 1–4 show  $\text{NaBH}_4$ -reduced histone samples from HEK293T cells subjected to no treatment, acetoacetate, 0.1 mM AHA plus acetoacetate, or 0.5 mM AHA plus acetoacetate, whereas lanes 5–8 show the corresponding non- $\text{NaBH}_4$ -reduced histone samples under the same conditions.
