# Supplementary material for: Identification of the Regulatory Elements and Protein Substrates of Lysine Acetoacetylation
Source: eLife journal article supplement (doi:10.7554/elife.104123), 2025-04-22
Supplement: fig3-figsupp1-data1 [file elife-104123-fig3-figsupp1-data1-v1.pdf]

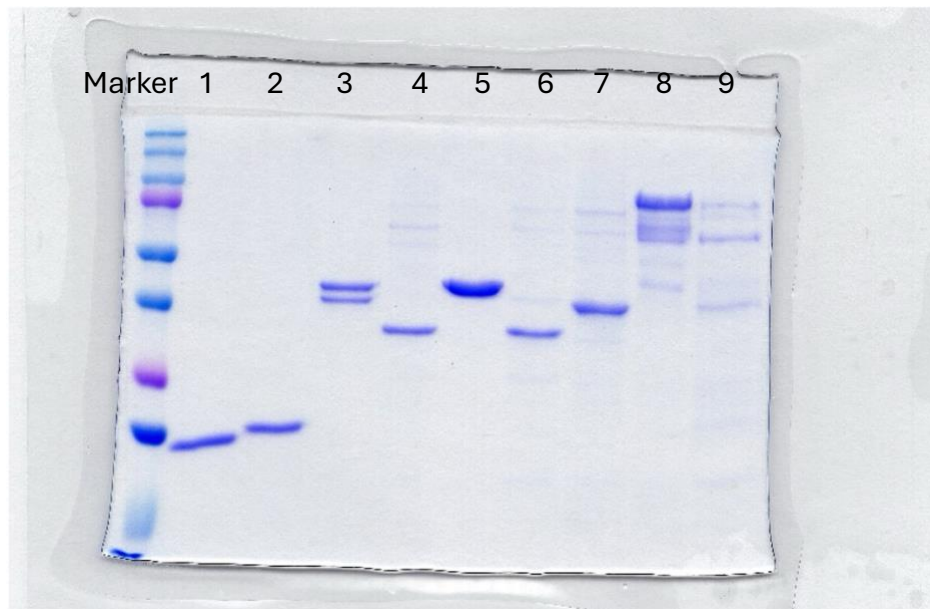

**Figure 3-figure supplement 1, Source Data 1.** (A) Original SDS-PAGE gel corresponding to Figure 3-figure supplement 1, panel A. Lanes 1–9 display GCN5, PCAF, p300, Tip60, MOF, MOZ, HAT1, MORF, and HBO1, respectively.

Detected by blotting with anti-Kac

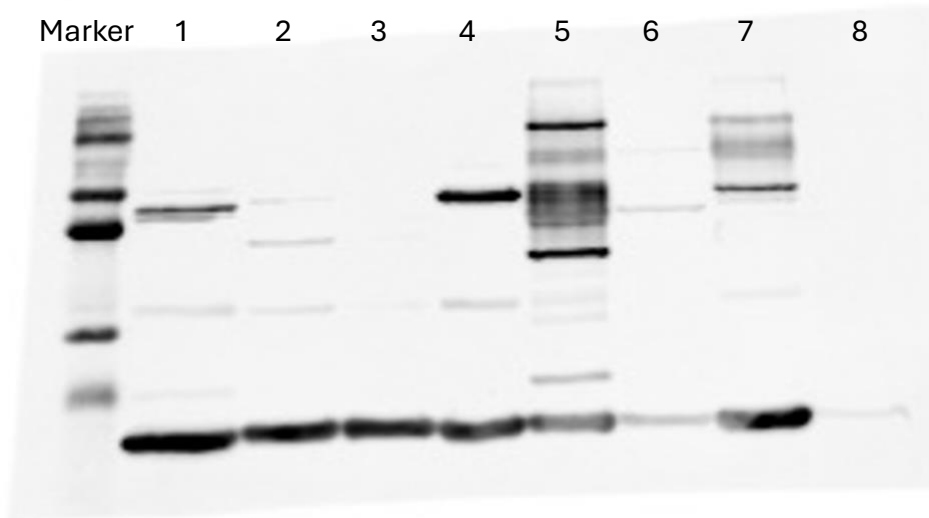

Ponceau staining

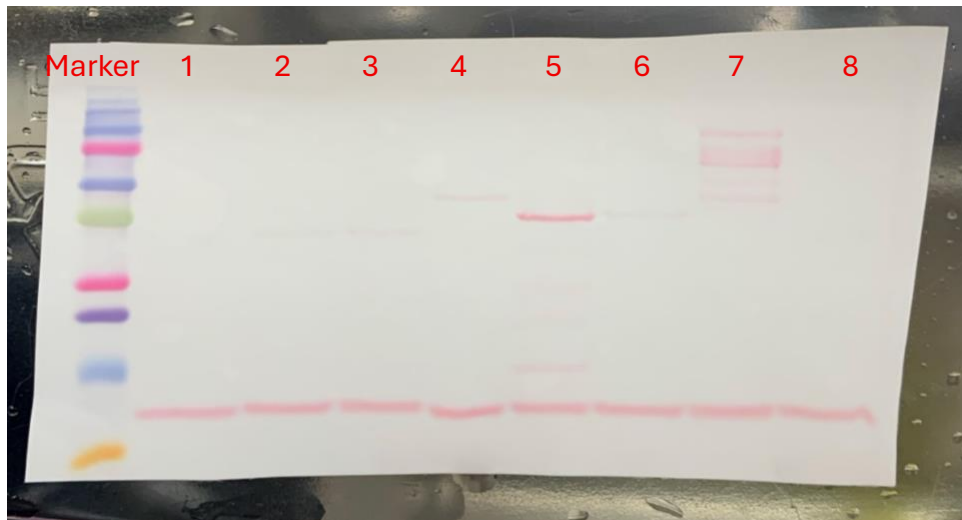

**Figure 3-figure supplement 1, Source Data 1.** (B) Original membranes corresponding to Figure 3-figure supplement 1, panel B. Lanes 1–8 show histone H4 samples incubated with acetyl-CoA either in the presence of p300, Tip60, MOZ, MOF, HBO1, HAT1, or MORF, or in the absence of enzyme.

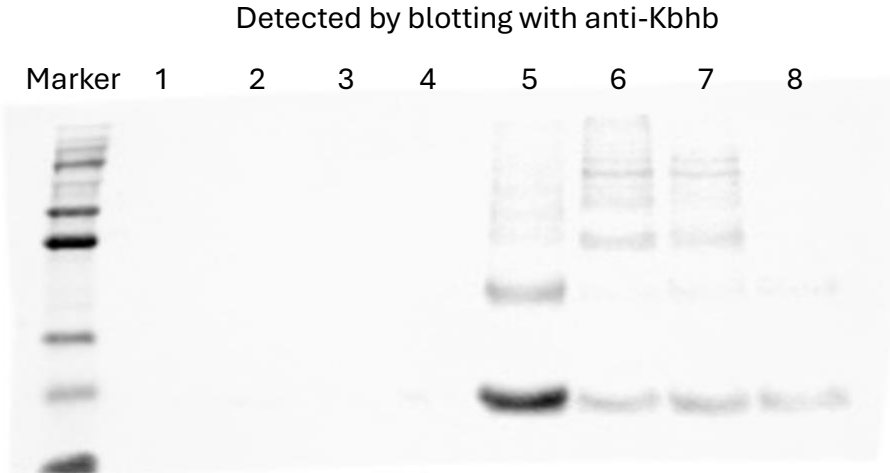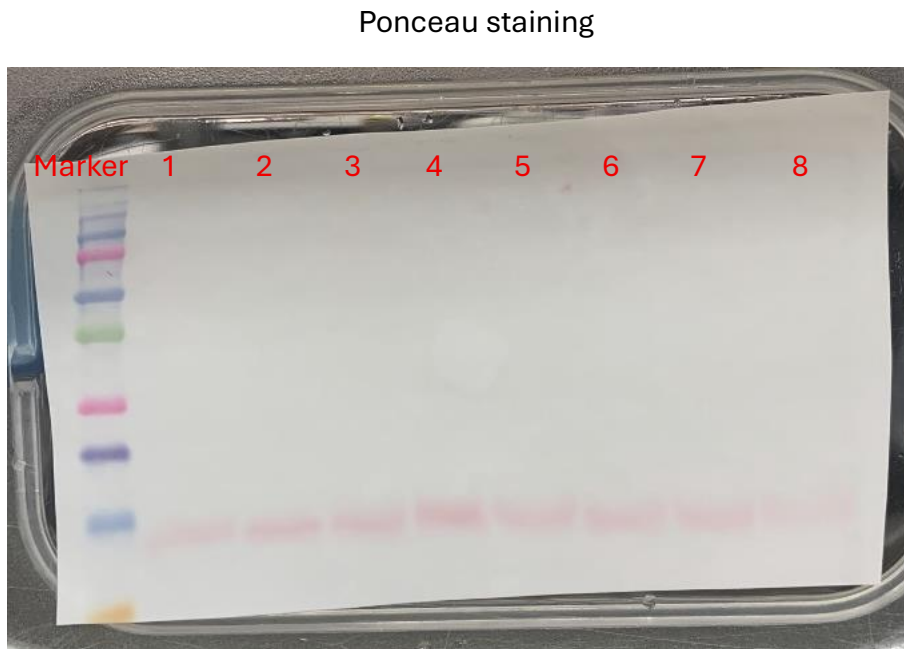

**Figure 3-figure supplement 1, Source Data 1.** (C) Original membranes corresponding to Figure 3-figure supplement 1, panel C. Lanes 1–4 show non- $\text{NaBH}_4$ -reduced samples from reactions in which histone H4 was incubated with acetoacetyl-CoA either in the presence of p300, Tip60, or MOZ, or in the absence of enzyme. Lanes 5–8 show the corresponding  $\text{NaBH}_4$ -reduced samples from the same HAT reactions.

Detected by blotting with anti-Kbhb

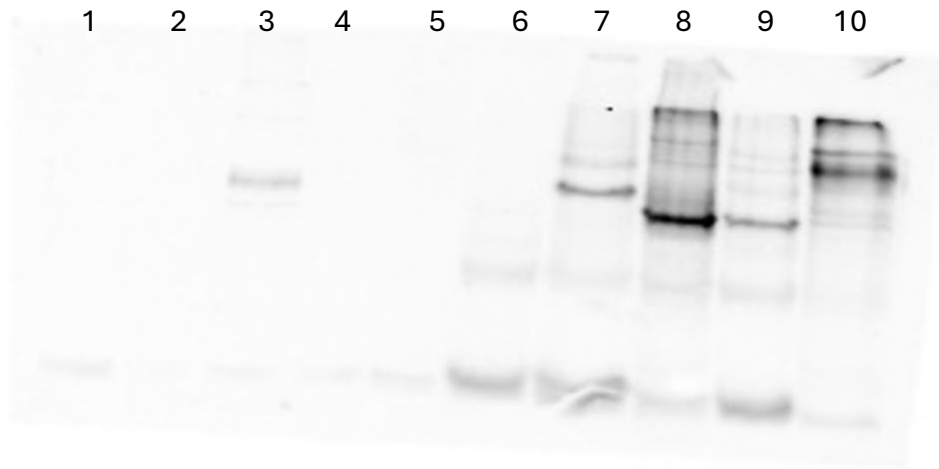

Ponceau staining

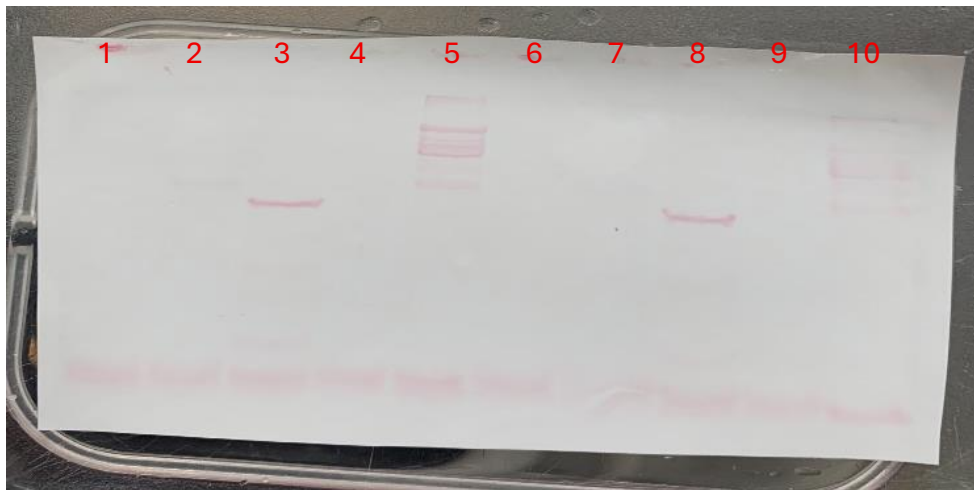

**Figure 3-figure supplement 1, Source Data 1.** (D) Original membranes corresponding to Figure 3-figure supplement 1, panel D. Lanes 1–5 show non- $\text{NaBH}_4$ -reduced samples from reactions in which histone H4 was incubated with acetoacetyl-CoA either in the absence of enzyme or in the presence of MOF, HBO1, HAT1, or MORF. Lanes 6–10 show the corresponding  $\text{NaBH}_4$ -reduced samples from the same HAT reactions.

Detected by blotting with anti-Kbhb

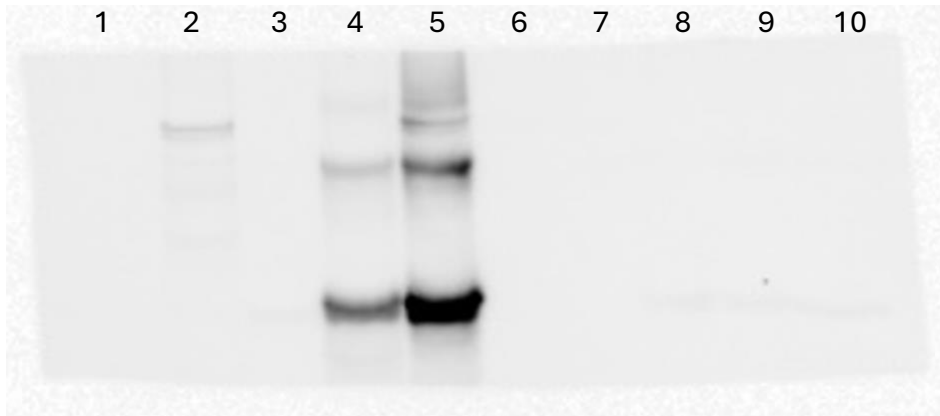

Ponceau staining

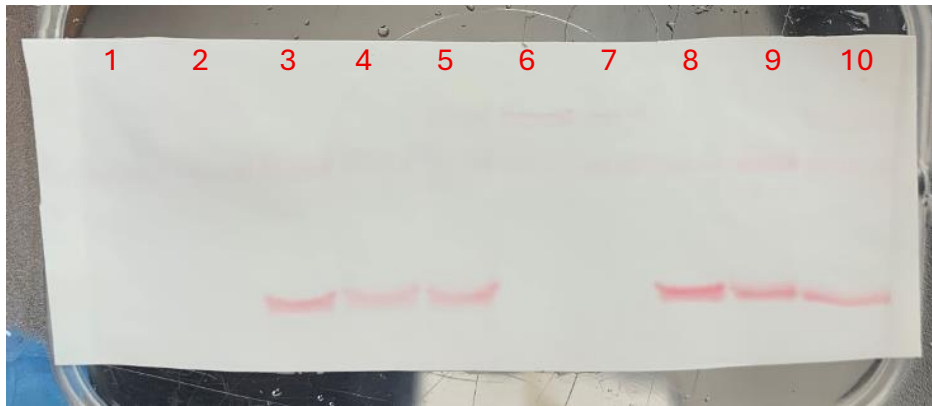

**Figure 3-figure supplement 1, Source Data 1.** (E) Original membranes corresponding to Figure 3-figure supplement 1, panel E. Lanes 1–5 show NaBH<sub>4</sub>-reduced samples from reactions containing p300 alone; acetoacetyl-CoA with p300; histone H3 alone; histone H3 with acetoacetyl-CoA; and histone H3 incubated with both acetoacetyl-CoA and p300. Lanes 6–10 show the corresponding non-NaBH<sub>4</sub>-reduced samples under the same conditions.

Detected by blotting with anti-Kbhb

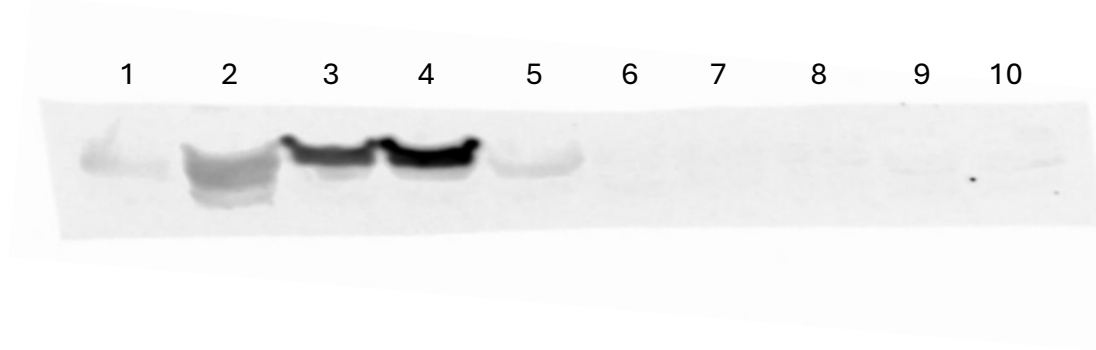

Ponceau staining

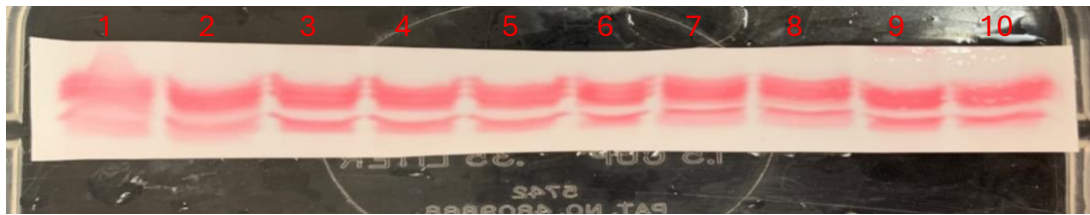

**Figure 3-figure supplement 1, Source Data 1.** (F) Original membranes corresponding to Figure 3-figure supplement 1, panel F. Lanes 1–5 show  $\text{NaBH}_4$ -reduced samples from reactions in which cellular histone extracts were incubated with acetoacetyl-CoA either in the absence of enzyme or in the presence of p300, GCN5, PCAF, or HAT1. Lanes 6–10 show the corresponding non- $\text{NaBH}_4$ -reduced samples from the same HAT reactions.

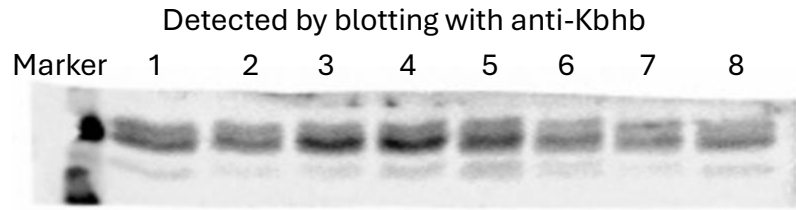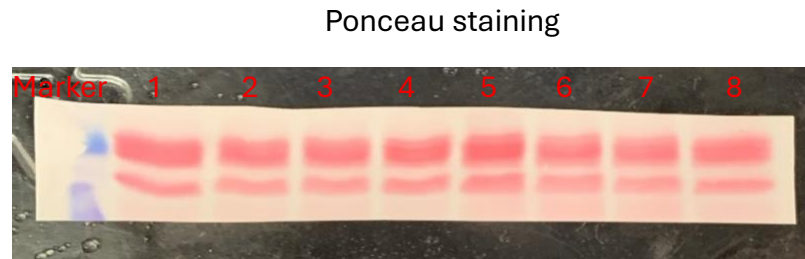

**Figure 3-figure supplement 1, Source Data 1.** (G) Original membranes corresponding to Figure 3-figure supplement 1, panel G. Lanes 1–4 show  $\text{NaBH}_4$ -reduced histone samples from HEK293T cells under the following conditions: no treatment, p300 overexpression, p300 overexpression with acetoacetate treatment, and acetoacetate treatment. Lanes 5–8 show the corresponding non- $\text{NaBH}_4$ -reduced histone samples under the same conditions.
