# Supplementary material for: Identification of the Regulatory Elements and Protein Substrates of Lysine Acetoacetylation
Source: eLife journal article supplement (doi:10.7554/elife.104123), 2025-04-22
Supplement: fig3-figsupp2-data1 [file elife-104123-fig3-figsupp2-data1-v1.pdf]

Detected by blotting with anti-Kbhb

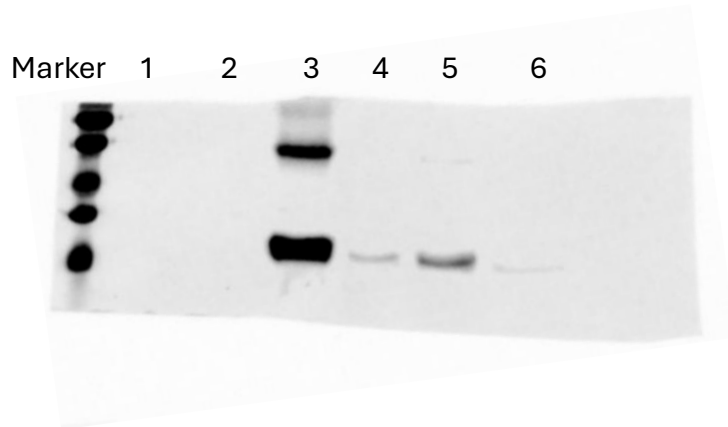

Detected by blotting with anti-Kac

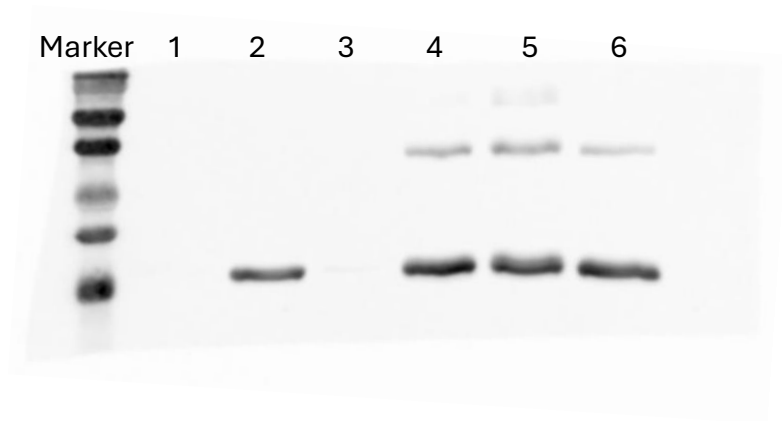

Ponceau staining

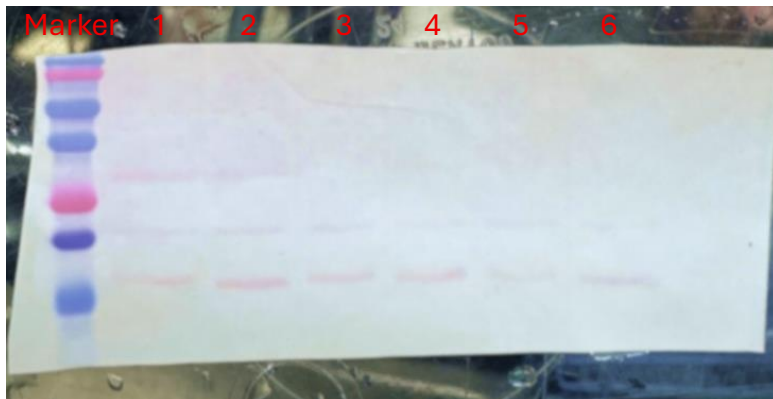

**Figure 3-figure supplement 2, Source Data 1.** (B) Original membranes corresponding to Figure 3-figure supplement 2, panel B. Lanes 1–6 show  $\text{NaBH}_4$ -reduced samples from reactions in which histone H3 and PCAF were incubated with no added substrate; 10  $\mu\text{M}$  acetyl-CoA; 10  $\mu\text{M}$  acetoacetyl-CoA; 10  $\mu\text{M}$  acetyl-CoA plus 10  $\mu\text{M}$  acetoacetyl-CoA; 10  $\mu\text{M}$  acetyl-CoA plus 50  $\mu\text{M}$  acetoacetyl-CoA; or 50  $\mu\text{M}$  acetyl-CoA plus 10  $\mu\text{M}$  acetoacetyl-CoA.

Detected by blotting with anti-Kbhb

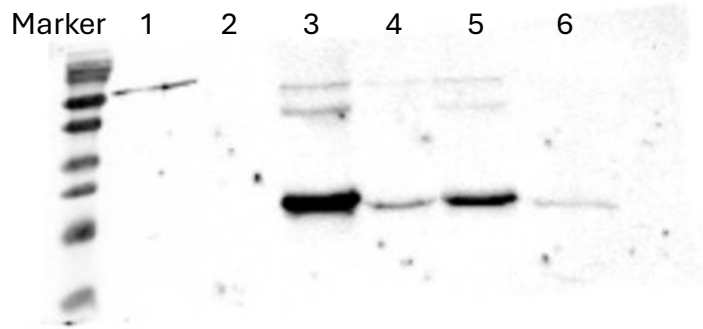

Detected by blotting with anti-Kac

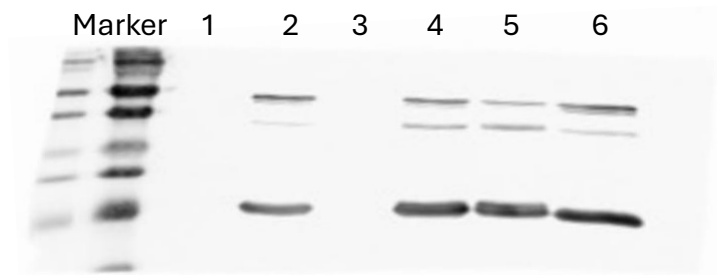

Ponceau staining

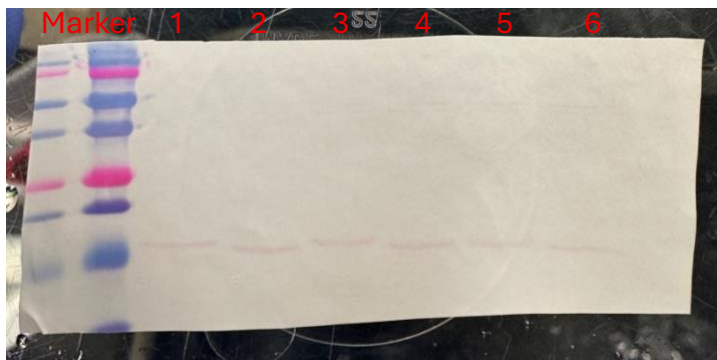

**Figure 3-figure supplement 2, Source Data 1.** (C) Original membranes corresponding to Figure 3-figure supplement 2, panel C. Lanes 1–6 show NaBH<sub>4</sub>-reduced samples from reactions in which histone H3 and p300 were incubated with no added substrate; 10 μM acetyl-CoA; 10 μM acetoacetyl-CoA; 10 μM acetyl-CoA plus 10 μM acetoacetyl-CoA; 10 μM acetyl-CoA plus 50 μM acetoacetyl-CoA; or 50 μM acetyl-CoA plus 10 μM acetoacetyl-CoA.

Detected by blotting with anti-Kbhb

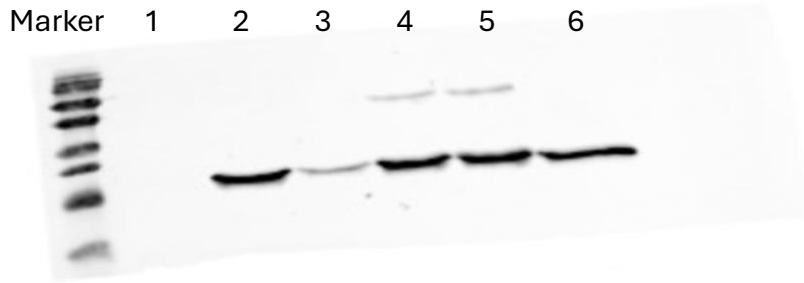

Detected by blotting with anti-Kbhb

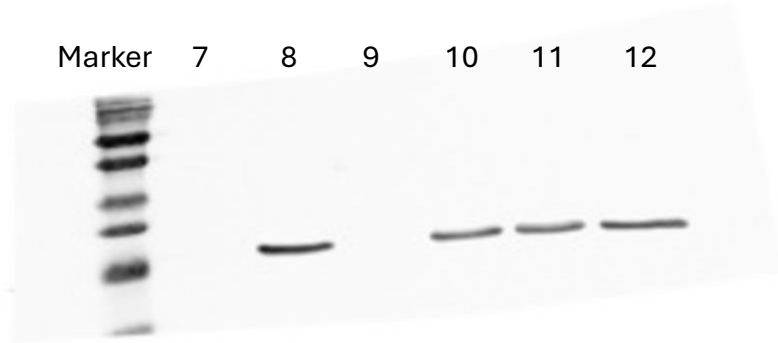

Ponceau staining

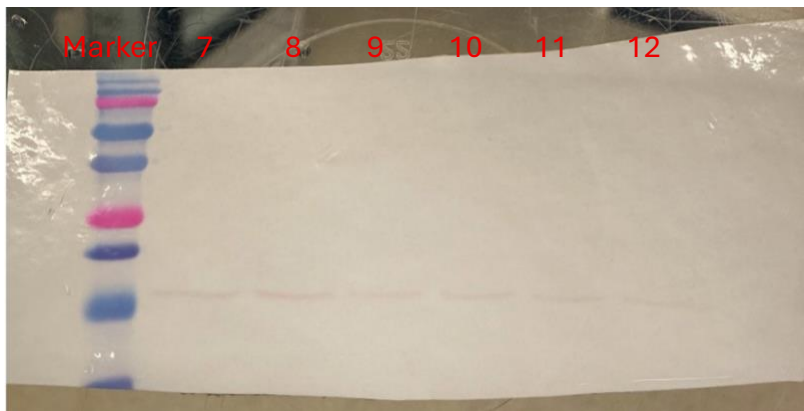

**Figure 3-figure supplement 2, Source Data 1.** (D) Original membranes corresponding to Figure 3-figure supplement 2, panel D. Lanes 1–6 show  $\text{NaBH}_4$ -reduced samples from reactions in which histone H3 and p300 were incubated with no added substrate; 10  $\mu\text{M}$   $\beta$ -hydroxybutyryl-CoA; 10  $\mu\text{M}$  acetoacetyl-CoA; 10  $\mu\text{M}$   $\beta$ -hydroxybutyryl-CoA plus 10  $\mu\text{M}$  acetoacetyl-CoA; 10  $\mu\text{M}$   $\beta$ -hydroxybutyryl-CoA plus 50  $\mu\text{M}$  acetoacetyl-CoA; or 50  $\mu\text{M}$   $\beta$ -hydroxybutyryl-CoA plus 10  $\mu\text{M}$  acetoacetyl-CoA. Lanes 7–12 show the corresponding non- $\text{NaBH}_4$ -reduced samples under the same conditions.
